# Supplementary material
Source: PubMed Central journal article supplement (PMC4119070)
Supplement: cbt-15-1029-s01.pdf [file cbt-15-1029-s01.pdf]

## **Supplemental Material to:**

**Milos Dokmanovic, Yun Wu, Yi Shen, Jieqing Chen,  
Dianne S Hirsch, Wen Jin Wu**

**Trastuzumab-induced recruitment of Csk-homologous  
kinase (CHK) to ErbB2 receptor is associated with  
ErbB2-Y1248 phosphorylation and ErbB2 degradation  
to mediate cell growth inhibition**

**Cancer Biology & Therapy 2014; 15(8)**

**<http://dx.doi.org/10.4161/cbt.29171>**

**<http://www.landesbioscience.com/journals/cbt/article/29171/>**

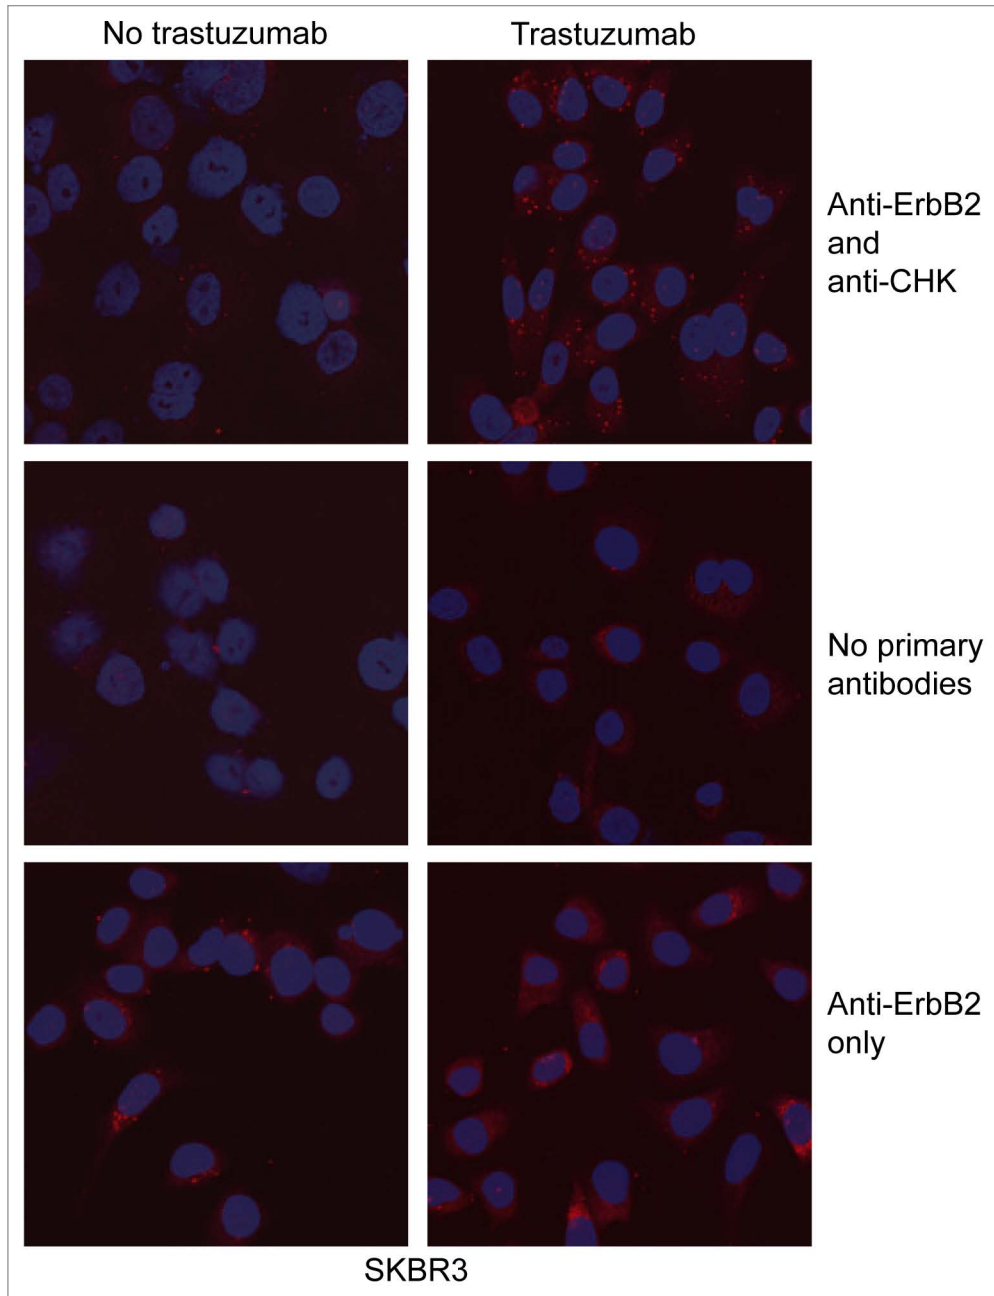

**Figure S1.** Trastuzumab treatment increases the interaction between ErbB2 and CHK in SKBR3 cells. The experimental procedures are essentially the same as described in **Figure 3B** except that SKBR3 cells were used.

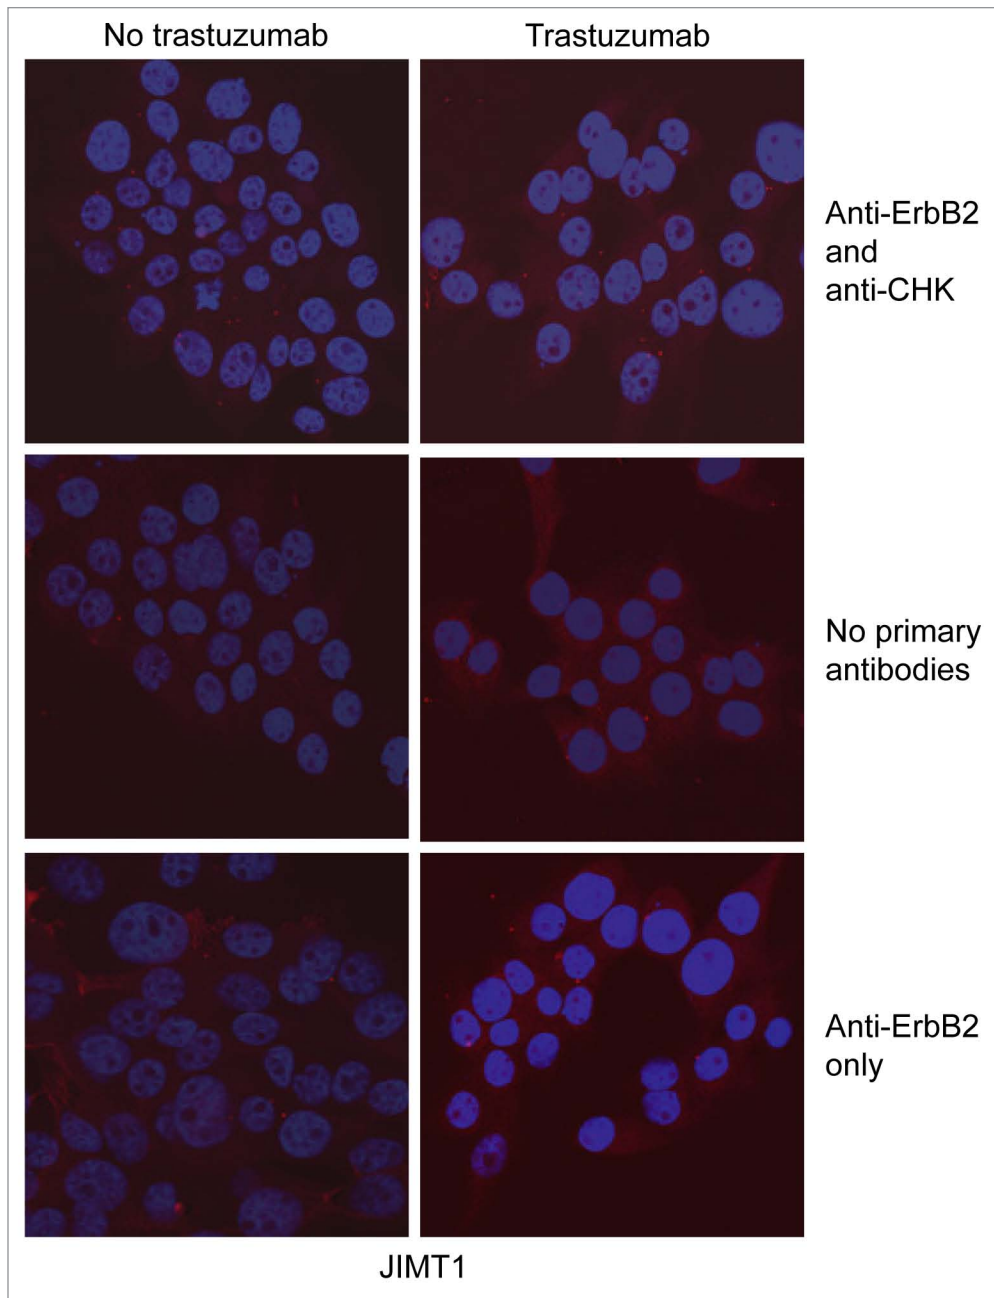

**Figure S2.** Trastuzumab treatment does not increase the interaction between ErbB2 and CHK in JIMT1 cells. The experimental procedures were essentially the same as those described in **Figure 3B** except JIMT1 cells were used for this experiment.
